# Supplementary material for: A fluorescent sensor for Cu2+and Fe3+based on multiple mechanisms
Source: Royal Society of Chemistry journal article supplement (doi:10.1039/c6ra09535f), 2016-01-01
Supplement: c6ra09535f1.pdf [file c6ra09535f1.pdf]

## ELECTRONIC SUPPLEMENTARY INFORMATION

### **A fluorescent sensor for Cu<sup>2+</sup> and Fe<sup>3+</sup> based on multiple mechanisms**

Wei He\* and Zheng Liu\*

School of Chemistry and Chemical Engineering, University of Jinan, Jinan 250022, China.

\*Corresponding author:

Wei He

Zheng Liu

School of Chemistry and Chemical Engineering, University of Jinan

Jinan 250022, China

E-mail address: [chm\\_hew@ujn.edu.cn](mailto:chm_hew@ujn.edu.cn) (W. He)

[liuzhengbeyond@163.com](mailto:liuzhengbeyond@163.com) (Z. Liu)

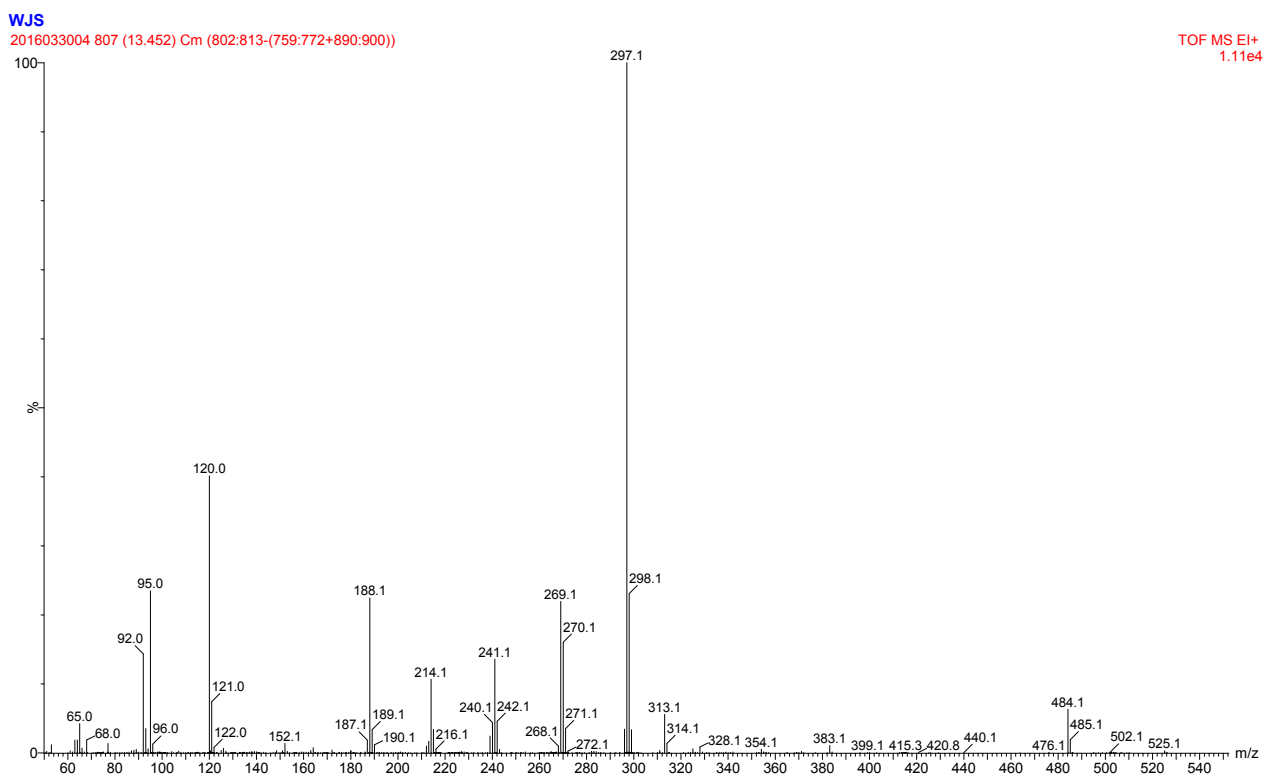

Figure S1. ESI mass spectrum of L.

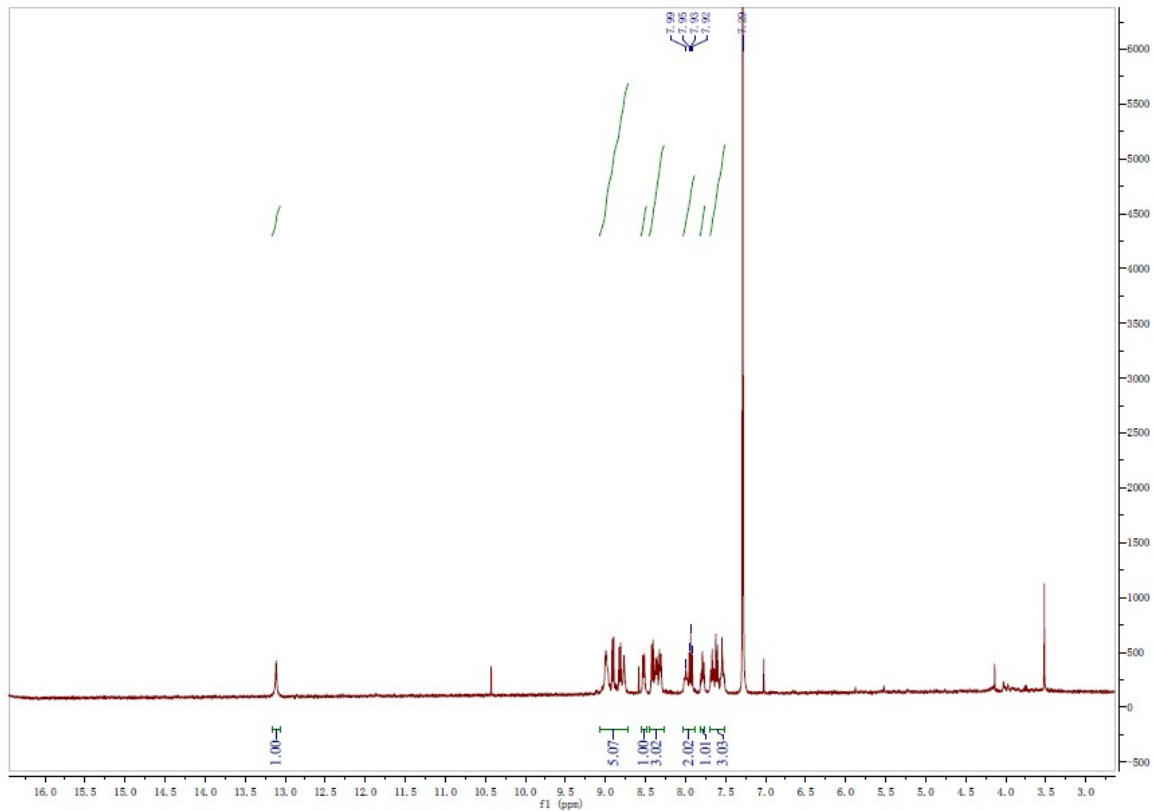

Figure S2.  $^1\text{H}$  NMR spectra of L in  $\text{CDCl}_3$ .

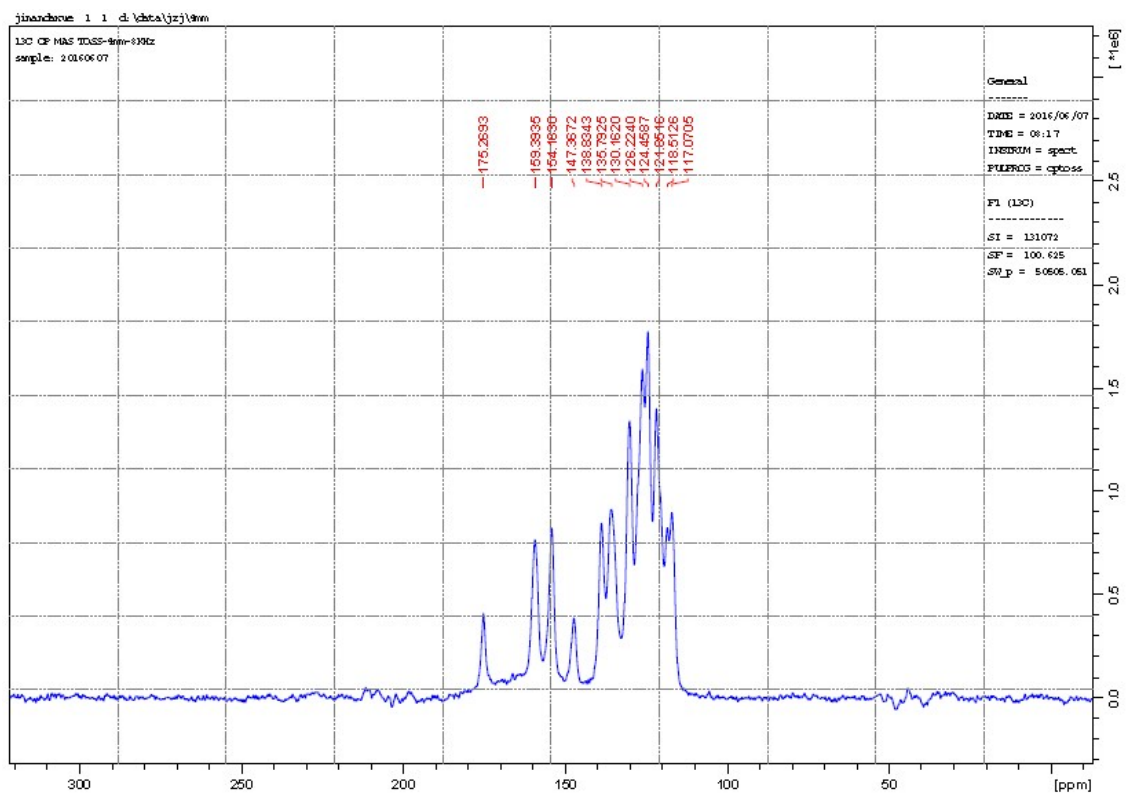

Figure S3.  $^{13}\text{C}$  CP/MAS NMR spectra of **L**.

**Table S1.** XYZ coordination of the optimized structure of **L**.

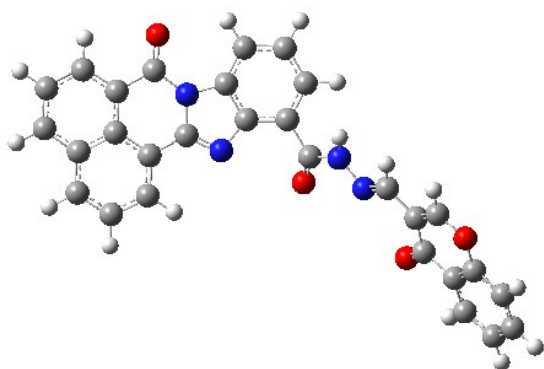

Standard orientation:

| Center Number | Atomic Number | Forces (Hartrees/Bohr) |              |              |
|---------------|---------------|------------------------|--------------|--------------|
|               |               | X                      | Y            | Z            |
| 1             | 6             | -0.000000953           | 0.000001894  | -0.000001508 |
| 2             | 6             | -0.000001640           | 0.000001653  | 0.000000263  |
| 3             | 6             | -0.000000605           | 0.000001283  | -0.000001314 |
| 4             | 6             | -0.000000533           | 0.000001630  | -0.000000786 |
| 5             | 6             | -0.000001456           | 0.000001693  | -0.000000543 |
| 6             | 6             | -0.000001190           | 0.000000694  | -0.000000602 |
| 7             | 1             | -0.000000918           | 0.000000796  | -0.000000544 |
| 8             | 6             | -0.000000939           | 0.000000941  | 0.000000132  |
| 9             | 6             | -0.000000681           | 0.000001546  | -0.000000423 |
| 10            | 1             | -0.000001408           | 0.000001892  | -0.000000858 |
| 11            | 1             | -0.000001392           | 0.000001730  | -0.000000872 |
| 12            | 6             | -0.000000459           | 0.000001412  | -0.000000879 |
| 13            | 6             | -0.000000220           | 0.000001440  | -0.000000358 |
| 14            | 1             | -0.000001013           | 0.000001823  | -0.000000640 |
| 15            | 1             | -0.000000224           | 0.000001421  | -0.000000463 |
| 16            | 1             | 0.000000228            | 0.000000794  | -0.000000316 |
| 17            | 6             | 0.000008918            | -0.000005073 | 0.000000290  |
| 18            | 6             | 0.000001610            | 0.000000970  | -0.000001289 |
| 19            | 7             | -0.000000867           | 0.000001814  | 0.000001353  |
| 20            | 7             | -0.000005473           | 0.000006361  | 0.000000056  |
| 21            | 6             | 0.000003030            | -0.000002398 | -0.000003842 |
| 22            | 6             | -0.000002870           | -0.000000864 | 0.000002651  |
| 23            | 6             | -0.000001178           | -0.000002826 | -0.000002198 |
| 24            | 6             | 0.000002323            | 0.000001880  | -0.000000675 |
| 25            | 6             | 0.000000542            | 0.000000387  | 0.000005003  |
| 26            | 6             | 0.000001411            | -0.000000912 | -0.000002548 |
| 27            | 1             | 0.000001507            | -0.000000920 | -0.000000091 |

|    |   |              |              |              |
|----|---|--------------|--------------|--------------|
| 28 | 1 | 0.000001908  | -0.000000745 | 0.000000408  |
| 29 | 1 | 0.000001082  | -0.000000232 | -0.000000075 |
| 30 | 6 | 0.000001212  | 0.000005794  | -0.000000214 |
| 31 | 8 | 0.000000988  | -0.000002453 | -0.000001577 |
| 32 | 8 | -0.000000021 | 0.000000050  | 0.000000284  |
| 33 | 7 | -0.000000515 | -0.000004721 | -0.000002845 |
| 34 | 7 | 0.000000946  | -0.000002579 | 0.000004951  |
| 35 | 6 | 0.000002352  | 0.000014928  | -0.000002011 |
| 36 | 6 | -0.000000532 | -0.000001505 | 0.000000736  |
| 37 | 6 | 0.000000200  | -0.000001741 | 0.000000216  |
| 38 | 6 | -0.000000912 | -0.000001052 | 0.000001061  |
| 39 | 6 | -0.000000500 | -0.000000781 | 0.000000631  |
| 40 | 6 | -0.000000771 | -0.000000882 | 0.000000470  |
| 41 | 6 | 0.000000588  | -0.000001015 | -0.000000093 |
| 42 | 1 | -0.000000756 | -0.000002011 | 0.000000940  |
| 43 | 1 | -0.000000580 | -0.000001635 | 0.000000546  |
| 44 | 1 | -0.000000392 | -0.000000657 | 0.000000132  |
| 45 | 1 | -0.000000066 | 0.000000059  | 0.000000238  |
| 46 | 6 | -0.000000037 | -0.000004706 | 0.000001883  |
| 47 | 6 | 0.000000345  | -0.000003442 | 0.000002465  |
| 48 | 1 | 0.000000172  | -0.000000775 | -0.000000039 |
| 49 | 1 | -0.000000589 | -0.000007337 | 0.000001915  |
| 50 | 6 | 0.000000585  | -0.000000785 | 0.000000944  |
| 51 | 8 | -0.000000239 | -0.000000680 | -0.000000542 |
| 52 | 8 | 0.000000150  | -0.000000982 | -0.000000593 |
| 53 | 1 | -0.000000166 | -0.000001177 | 0.000001171  |

---

**Table S2.** XYZ coordination of the optimized structure of  $L+Cu^{2+}$ .

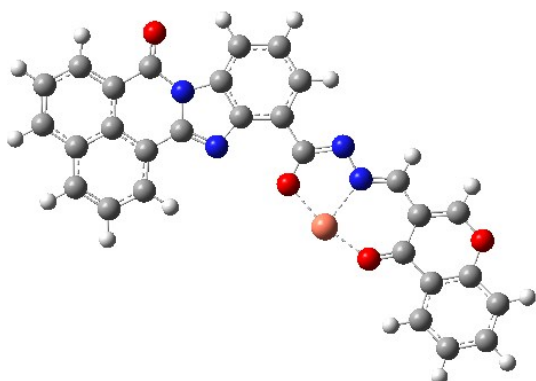

Standard orientation:

| Center Number | Atomic Number | Forces (Hartrees/Bohr) |              |              |
|---------------|---------------|------------------------|--------------|--------------|
|               |               | X                      | Y            | Z            |
| 1             | 6             | 0.000001097            | 0.000002847  | -0.000003076 |
| 2             | 6             | -0.000000336           | -0.000001092 | -0.000000895 |
| 3             | 6             | 0.000000936            | -0.000004023 | 0.000001642  |
| 4             | 6             | -0.000000263           | 0.000003642  | -0.000000819 |
| 5             | 6             | 0.000003394            | -0.000002125 | 0.000001650  |
| 6             | 6             | -0.000002773           | -0.000000573 | 0.000000809  |
| 7             | 1             | -0.000000183           | -0.000000867 | -0.000000022 |
| 8             | 6             | -0.000004469           | 0.000001968  | -0.000000858 |
| 9             | 6             | 0.000000464            | -0.000001659 | 0.000001049  |
| 10            | 1             | -0.000000975           | -0.000000669 | -0.000000727 |
| 11            | 1             | 0.000001165            | 0.000000001  | 0.000000998  |
| 12            | 6             | -0.000000228           | 0.000000455  | 0.000001465  |
| 13            | 6             | 0.000003271            | 0.000000461  | 0.000000111  |
| 14            | 1             | -0.000000194           | -0.000000814 | 0.000000629  |
| 15            | 1             | -0.000000127           | 0.000000182  | 0.000000273  |
| 16            | 1             | -0.000000696           | 0.000000167  | 0.000001567  |
| 17            | 6             | 0.000011054            | 0.000002166  | 0.000003007  |
| 18            | 6             | 0.000003421            | -0.000003832 | 0.000012812  |
| 19            | 7             | -0.000005392           | -0.000003713 | -0.000008939 |
| 20            | 7             | -0.000014373           | -0.000005496 | -0.000002758 |
| 21            | 6             | 0.000001379            | 0.000019106  | 0.000002099  |
| 22            | 6             | 0.000009690            | -0.000005636 | 0.000005702  |
| 23            | 6             | -0.000019697           | 0.000007377  | 0.000005279  |
| 24            | 6             | -0.000002026           | -0.000004640 | -0.000006953 |
| 25            | 6             | -0.000005428           | 0.000006789  | 0.000000504  |
| 26            | 6             | 0.000005041            | -0.000004570 | 0.000001669  |
| 27            | 1             | -0.000001117           | 0.000000238  | 0.000000810  |

|    |    |              |              |              |
|----|----|--------------|--------------|--------------|
| 28 | 1  | -0.000000977 | 0.000001499  | -0.000000372 |
| 29 | 1  | -0.000000007 | 0.000001388  | 0.000002106  |
| 30 | 6  | 0.000007378  | 0.000012117  | -0.000007584 |
| 31 | 8  | 0.000000685  | -0.000026516 | 0.000007665  |
| 32 | 8  | -0.000001737 | 0.000002943  | -0.000002271 |
| 33 | 7  | -0.000006243 | 0.000005305  | 0.000000629  |
| 34 | 7  | 0.000008679  | 0.000020783  | -0.000005415 |
| 35 | 6  | 0.000010198  | -0.000035954 | -0.000005612 |
| 36 | 6  | -0.000004106 | -0.000006920 | 0.000000694  |
| 37 | 6  | -0.000000642 | 0.000000443  | -0.000001753 |
| 38 | 6  | -0.000004307 | -0.000000366 | -0.000001074 |
| 39 | 6  | -0.000000027 | 0.000001473  | -0.000001070 |
| 40 | 6  | -0.000001051 | 0.000003538  | -0.000000020 |
| 41 | 6  | -0.000000342 | -0.000000950 | -0.000000885 |
| 42 | 1  | 0.000000557  | 0.000000923  | 0.000000092  |
| 43 | 1  | 0.000001328  | 0.000000857  | -0.000001767 |
| 44 | 1  | -0.000000186 | -0.000000424 | -0.000001274 |
| 45 | 1  | 0.000000021  | -0.000000863 | -0.000002067 |
| 46 | 6  | -0.000005508 | 0.000012786  | -0.000004127 |
| 47 | 6  | -0.000005402 | -0.000009361 | 0.000006639  |
| 48 | 1  | 0.000002109  | 0.000000440  | 0.000003779  |
| 49 | 6  | 0.000016755  | 0.000013041  | 0.000001506  |
| 50 | 8  | -0.000009040 | -0.000009337 | 0.000006911  |
| 51 | 8  | -0.000000728 | 0.000007255  | -0.000008698 |
| 52 | 1  | -0.000001247 | 0.000000376  | 0.000000955  |
| 53 | 29 | 0.000011207  | -0.000000166 | -0.000004019 |

---

**Table S3.** XYZ coordination of the optimized structure of **L+Fe<sup>3+</sup>**.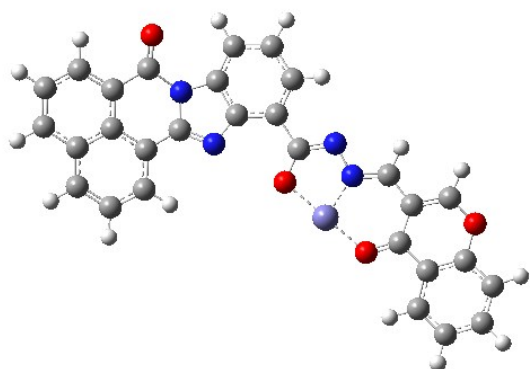

Standard orientation:

| Center Number | Atomic Number | Atomic Type | Coordinates (Angstroms) |           |           |
|---------------|---------------|-------------|-------------------------|-----------|-----------|
|               |               |             | X                       | Y         | Z         |
| 1             | 6             | 0           | -3.710625               | -2.614225 | -0.198848 |
| 2             | 6             | 0           | -4.353769               | -1.339945 | -0.143292 |
| 3             | 6             | 0           | -5.784302               | -1.258018 | -0.005716 |
| 4             | 6             | 0           | -6.548672               | -2.463539 | 0.034522  |
| 5             | 6             | 0           | -5.872117               | -3.696307 | -0.059579 |
| 6             | 6             | 0           | -4.466438               | -3.768480 | -0.170035 |
| 7             | 1             | 0           | -2.630817               | -2.648250 | -0.284536 |
| 8             | 6             | 0           | -6.437035               | -0.020719 | 0.106475  |
| 9             | 6             | 0           | -7.955430               | -2.385146 | 0.174734  |
| 10            | 1             | 0           | -6.446942               | -4.618192 | -0.046107 |
| 11            | 1             | 0           | -3.990580               | -4.740047 | -0.237855 |
| 12            | 6             | 0           | -8.587956               | -1.147595 | 0.287923  |
| 13            | 6             | 0           | -7.837343               | 0.027187  | 0.260949  |
| 14            | 1             | 0           | -8.543178               | -3.297578 | 0.193671  |
| 15            | 1             | 0           | -9.665244               | -1.100867 | 0.399626  |
| 16            | 1             | 0           | -8.315931               | 0.995808  | 0.358359  |
| 17            | 6             | 0           | -3.634373               | -0.136280 | -0.209909 |
| 18            | 6             | 0           | -5.679018               | 1.254951  | 0.083075  |
| 19            | 7             | 0           | -4.284510               | 1.086158  | -0.287524 |
| 20            | 7             | 0           | -2.276920               | 0.006274  | -0.124788 |
| 21            | 6             | 0           | -2.048323               | 1.313985  | -0.097615 |
| 22            | 6             | 0           | -3.289753               | 2.065068  | -0.162116 |
| 23            | 6             | 0           | -0.780703               | 2.027533  | -0.021873 |
| 24            | 6             | 0           | -3.348945               | 3.435519  | -0.120786 |
| 25            | 6             | 0           | -0.866892               | 3.415436  | 0.030974  |
| 26            | 6             | 0           | -2.101529               | 4.095025  | -0.006578 |
| 27            | 1             | 0           | 0.043579                | 3.997285  | 0.091765  |



|    |    |   |           |           |           |
|----|----|---|-----------|-----------|-----------|
| 28 | 1  | 0 | -2.093894 | 5.179210  | 0.043769  |
| 29 | 1  | 0 | -4.280350 | 3.984251  | -0.157249 |
| 30 | 6  | 0 | 0.520233  | 1.316311  | -0.017658 |
| 31 | 8  | 0 | 0.580325  | 0.034125  | -0.070856 |
| 32 | 8  | 0 | -6.127150 | 2.357858  | 0.300097  |
| 33 | 7  | 0 | 1.622421  | 2.101634  | 0.037740  |
| 34 | 7  | 0 | 2.711530  | 1.311741  | 0.013418  |
| 35 | 6  | 0 | 3.925651  | 1.850878  | 0.049617  |
| 36 | 6  | 0 | 7.639241  | -0.207404 | 0.029570  |
| 37 | 6  | 0 | 8.924650  | -0.725666 | 0.105812  |
| 38 | 6  | 0 | 9.063503  | -2.113054 | 0.175355  |
| 39 | 6  | 0 | 7.937508  | -2.953803 | 0.155920  |
| 40 | 6  | 0 | 6.660751  | -2.417976 | 0.083331  |
| 41 | 6  | 0 | 6.482741  | -1.016102 | 0.025535  |
| 42 | 1  | 0 | 9.777430  | -0.057449 | 0.117007  |
| 43 | 1  | 0 | 10.056566 | -2.542293 | 0.248184  |
| 44 | 1  | 0 | 8.068577  | -4.028783 | 0.198652  |
| 45 | 1  | 0 | 5.788346  | -3.059721 | 0.070861  |
| 46 | 6  | 0 | 5.140521  | 1.076346  | 0.024380  |
| 47 | 6  | 0 | 6.361081  | 1.769065  | 0.023218  |
| 48 | 1  | 0 | 3.970824  | 2.938019  | 0.089680  |
| 49 | 6  | 0 | 5.175674  | -0.398361 | -0.013810 |
| 50 | 8  | 0 | 4.123012  | -1.131203 | -0.085062 |
| 51 | 8  | 0 | 7.516741  | 1.177213  | -0.044688 |
| 52 | 1  | 0 | 6.446313  | 2.850819  | 0.071320  |
| 53 | 26 | 0 | 2.365163  | -0.569420 | -0.075633 |

---
